# Supplementary material
Source: PubMed Central journal article supplement (PMC10125386)
Supplement: bg2c00034_si_001.pdf [file bg2c00034_si_001.pdf]

## Supporting Information

### **A Dual-Reporter System for Real-Time Monitoring of SARS-CoV-2 Main Protease Activity in Live Cells Enables Identification of an Allosteric Inhibition Path.**

Authors: Yaron Bram<sup>1,7</sup>, Xiaohua Duan<sup>2,7</sup>, Benjamin E. Nilsson-Payant<sup>3,6,7</sup>, Vasuretha Chandar<sup>1</sup>, Hao Wu<sup>4,7</sup>, Derek Shore<sup>4,7</sup>, Alvaro Fajardo<sup>5</sup>, Saloni Sinha<sup>1</sup>, Nora Hassan<sup>1</sup>, Harel Weinstein<sup>4\*</sup>, Benjamin R. TenOever<sup>3,5\*</sup>, Shuibing Chen<sup>2,\*</sup>, Robert E. Schwartz<sup>1,4,8,\*</sup>.

<sup>1</sup> Division of Gastroenterology and Hepatology, Department of Medicine, Weill Cornell Medicine, 1300 York Ave, New York, NY 10065, USA

<sup>2</sup> Department of Surgery, Weill Cornell Medicine, 1300 York Ave, New York, NY 10065, USA

<sup>3</sup> Department of Microbiology, Icahn School of Medicine at Mount Sinai, One Gustav L Levy Place, New York, NY 10029, USA

<sup>4</sup> Department of Physiology, Biophysics, Weill Cornell Medicine, 1300 York Ave, New York, NY 10065, USA

<sup>5</sup> Current location: Department of Microbiology, New York University, New York, NY 10016, USA.

<sup>6</sup> Current location: TWINCORE Centre for Experimental and Clinical Infection Research, Institute for Experimental Virology, 30625 Hannover, Germany.

<sup>7</sup> These authors contributed equally.

<sup>8</sup> Lead Contact

\* Correspondence: haw2002@med.cornell.edu (H.W.), Benjamin.tenOever@NYUlangone.org (B.T.), shc2034@med.cornell.edu (S.C.), res2025@med.cornell.edu (R.E.S.).

### **SUPPLEMENTARY TABLES**

**Table S1.** Protease inhibitors used in this study.

**Table S2.** 3CL<sup>pro</sup> Inhibitors identified in the cell reporter chemical screen.

**Table S3.** Sequences of the primers used for qRT-PCR in this study.

**Table S4.** Inhibitors binding free energy (BFE).

**Table S5.** 3CL<sup>pro</sup> alanine substitution inhibition analysis.

**Table S6.** Coordination information of decoy sites.

**Table S7.** Idazoxan-S' coordination information.

### **SUPPLEMENTARY FIGURES**

**Figure S1.** Fluorescent images 3CL<sup>pro</sup> cell-reporter with different NSP's junction sequences.

**Figure S2.** 3CL<sup>pro</sup> cell reporter activity quantification with calpain inhibitors.

**Figure S3.** Chemical screen lead compounds IC<sub>50</sub> quantification using *In-vitro* FRET assay.

**Figure S4.** Inhibitors interactions with 3CL<sup>pro</sup> catalytic site.

**Figure S5.** Inhibitors interactions with 3CL<sup>pro</sup> dimerization site.

**Figure S6.** Structural definition of 3CL<sup>pro</sup> arbitrary sites used for comparison.

**Table S1 Protease Inhibitors**

|                                  |                               |                  |                                                                                      |
|----------------------------------|-------------------------------|------------------|--------------------------------------------------------------------------------------|
| <b>Boceprevir</b>                | <b>Selleck<br/>Chemicals</b>  | <b>S3733</b>     | 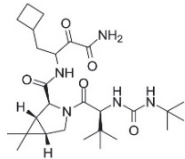   |
| <b>Rupintrivir</b>               | <b>Tocris</b>                 | <b>6414</b>      |    |
| <b>Calpain<br/>inhibitor II</b>  | <b>Sigma-Aldrich</b>          | <b>208722</b>    |    |
| <b>GC376</b>                     | <b>Carbosynth</b>             | <b>BG167367</b>  |    |
| <b>Calpain<br/>Inhibitor XII</b> | <b>Cayman<br/>Chemical</b>    | <b>14466</b>     |    |
| <b>Carmofur</b>                  | <b>Sigma-Aldrich</b>          | <b>C1494</b>     |  |
| <b>MDL28170</b>                  | <b>Tocris</b>                 | <b>1146</b>      |  |
| <b>ALLN</b>                      | <b>Santa Cruz<br/>Biotech</b> | <b>sc-221236</b> |  |
| <b>Calpain<br/>Inhibitor VI</b>  | <b>Santa Cruz<br/>Biotech</b> | <b>sc-293979</b> |  |
| <b>ALLM</b>                      | <b>Sigma-Aldrich</b>          | <b>208721</b>    |  |

Table S2 3Cl<sup>Pro</sup> Inhibitors

|              |               |       |                                                                                     |
|--------------|---------------|-------|-------------------------------------------------------------------------------------|
| Parthenolide | Sigma-Aldrich | P0667 | 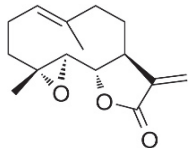  |
| EGCG         | Sigma-Aldrich | E4143 |   |
| Benserazide  | Sigma-Aldrich | B7283 |   |
| Idazoxan     | Sigma-Aldrich | I6138 |  |
| Mundulone    | MicroSource   | 14466 |  |

**Table S3. qPCR primers**

| <b>Primer name</b> | <b>Sequence</b>              |
|--------------------|------------------------------|
| 18s-Forward        | GGCCCTGTAATTGGAATGAGTC       |
| 18s-Reverse        | CCAAGATCCAACACTACGAGCTT      |
| SARS-CoV-2-TRS-L   | CTCTTGTAGATCTGTTCTCTAAACGAAC |
| SARS-CoV-2-TRS-N   | GGTCCACCAAACGTAATGCG         |
| GLuc-Forward       | TCTGATCTGCCTGTCCCACATCAAG    |
| GLuc-Reverse       | CCAGGAATCTCAGGAATGTGCGACGA   |

Table S4.

3CL<sup>pro</sup> inhibitors binding free energy (BFE)

| Compound              | Catalytic site                  |                                   | Dimer interface                 |                                   |
|-----------------------|---------------------------------|-----------------------------------|---------------------------------|-----------------------------------|
|                       | Total binding free energy (BFE) | Residue w/ largest decomposed BFE | Total binding free energy (BFE) | Residue w/ largest decomposed BFE |
| Benserazide-R (BEN-R) | <b>-10.6</b>                    | E166 (-5.4)                       | 0.4                             | D289 (-3.1)                       |
| Benserazide-S (BEN-S) | <b>-17.4</b>                    | <b>C44 (-6.1)</b>                 | -5.6                            | E166 (-4.3)                       |
| EGCG                  | -21.5                           | C145 (-3.5)                       | -21.8                           | C128 (-3.3)                       |
| Idazoxan-R (IDX-R)    | -19.0                           | <b>C44 (-1.8)</b>                 | -17.7                           | <b>S284 (-1.6)</b>                |
| Idazoxan-S (IDX-S)    | -11.0                           | <b>C44 (-1.2)</b>                 | -16.0                           | <b>S284 (-1.0)</b>                |
| Mundulone-R (MND-R)   | -24.4                           | D187 (-2.5)                       | -21.0                           | <b>R4 (-2.2)</b>                  |
| Mundulone-S (MND-S)   | -16.1                           | H41 (-1.4)                        | <b>-23.5</b>                    | <b>R4 (-5.7)</b>                  |
| Parthenolide (PRT)    | -13.1                           | M165 (-1.3)                       | <b>-28.0</b>                    | <b>Q299 (-2.2)</b>                |
|                       |                                 |                                   |                                 | <b>F291 (-1.1)</b>                |
|                       |                                 |                                   |                                 | F3 (-0.8)                         |
|                       |                                 |                                   |                                 | K137 (-1.9)                       |
|                       |                                 |                                   |                                 | M6 (-1.4)                         |
|                       |                                 |                                   |                                 | <b>F291 (-1.7)</b>                |

All energy values are in the unit of kcal/mol

**Table S5. 3C1<sup>pro</sup> alanine substitution analysis**

| Compound                            | WT    | Catalytic Site |        |       | Dimer Interface |       |        |
|-------------------------------------|-------|----------------|--------|-------|-----------------|-------|--------|
|                                     |       | C44A           | M165A  | D187A | R4A             | E288A | Q299A  |
| <b>Benserazide</b>                  | 65.78 | 137.2          | * n.i  | **    | * n.i           | 40.3  | 174.10 |
| <b>EGCG</b>                         | 11.91 | 189.70         | 71.10  |       | 48.24           | 42.58 | 9.36   |
| <b>Idazoxan</b>                     | 21.31 | 42.71          | 104.03 |       | * n.i           | 22.53 | 111.20 |
| <b>Mundulone</b>                    | 0.62  | 4.88           | 13.59  |       | 3.67            | 2.376 | 9.36   |
| <b>Parthenolide</b>                 | 1.22  | 4.68           | 5.58   |       | 4.01            | 6.59  | 15.21  |
| * no inhibition, ** inactive enzyme |       |                |        |       |                 |       |        |
| IC50 (μM)                           |       |                |        |       |                 |       |        |

**Table S6. Coordination information among decoy sites**

**A**

|                    |      | Apo NSP5          |           |           | Parthenolide-bound NSP5 |           |           |
|--------------------|------|-------------------|-----------|-----------|-------------------------|-----------|-----------|
|                    |      | Total correlation | DBS       | CI (NCI)  | Total correlation       | DBS       | CI (NCI)  |
| <b>Coordinated</b> | D1_A | 15.0              | 0.8 (6%)  | 1.7 (11%) | 20.9                    | 1.1 (5%)  | 3.0 (14%) |
|                    | D2_A | 12.0              | 1.1 (10%) | 1.1 (9%)  | 15.4                    | 1.1 (7%)  | 1.5 (10%) |
|                    | D3_A | 17.8              | 1.9 (11%) | 1.0 (6%)  | 17.7                    | 2.0 (11%) | 0.7 (4%)  |
|                    | D1_B | 16.9              | 1.7 (10%) | 1.3 (8%)  | 19.8                    | 1.1 (5%)  | 0.8 (4%)  |
|                    | D2_B | 10.9              | 1.3 (12%) | 1.1 (10%) | 15.7                    | 0.7 (5%)  | 1.0 (7%)  |
|                    | D3_B | 18.0              | 1.5 (8%)  | 1.4 (8%)  | 19.9                    | 1.6 (8%)  | 2.3 (12%) |
|                    |      |                   |           |           |                         |           |           |

**B**

|                    |      | Apo NSP5          |           |           | Parthenolide-bound NSP5 |           |           |
|--------------------|------|-------------------|-----------|-----------|-------------------------|-----------|-----------|
|                    |      | Total correlation | DBS       | CI (NCI)  | Total correlation       | DBS       | CI (NCI)  |
| <b>Coordinated</b> | D1_A | 15.0              | 0.8 (6%)  | 1.7 (11%) | 20.9                    | 1.1 (5%)  | 3.0 (14%) |
|                    | D2_A | 12.0              | 1.1 (10%) | 1.1 (9%)  | 15.4                    | 1.1 (7%)  | 1.5 (10%) |
|                    | D3_A | 17.8              | 1.9 (11%) | 1.0 (6%)  | 17.7                    | 2.0 (11%) | 0.7 (4%)  |
|                    | D1_B | 16.9              | 1.7 (10%) | 1.3 (8%)  | 19.8                    | 1.1 (5%)  | 0.8 (4%)  |
|                    | D2_B | 10.9              | 1.3 (12%) | 1.1 (10%) | 15.7                    | 0.7 (5%)  | 1.0 (7%)  |
|                    | D3_B | 18.0              | 1.5 (8%)  | 1.4 (8%)  | 19.9                    | 1.6 (8%)  | 2.3 (12%) |
|                    |      |                   |           |           |                         |           |           |

\* Normalized CI (NCI) by coordinated sites' total correlation are shown in parentheses.

**Table S7. Idazoxan-S' coordination information**

| Idazoxan-S-bound NSP5 |         |                   |              |           |           |
|-----------------------|---------|-------------------|--------------|-----------|-----------|
|                       |         |                   | Coordinators |           |           |
|                       |         |                   | CI (NCI)     |           |           |
|                       |         | Total correlation | DBS          | OR_apo    | OR_holo   |
| Coordinated           | DBS     | 19.9              | N/A          | 4.3 (22%) | 4.6 (23%) |
|                       | OR_apo  | 25.0              | 7.4 (30%)    | N/A       | N/A       |
|                       | OR_holo | 30.6              | 9.3 (30%)    | N/A       | N/A       |

\* Percentages of CI in coordinated sites' total correlation (normalized CI) are shown in parentheses

\*\* CI of one site itself is 100% and not shown. OR\_apo and OR\_holo have many shared residues so their mutual CIs are not shown.



**Fig. S1.**

**3CL<sup>pro</sup> cleavage efficiency of NSP's junction sequences.**

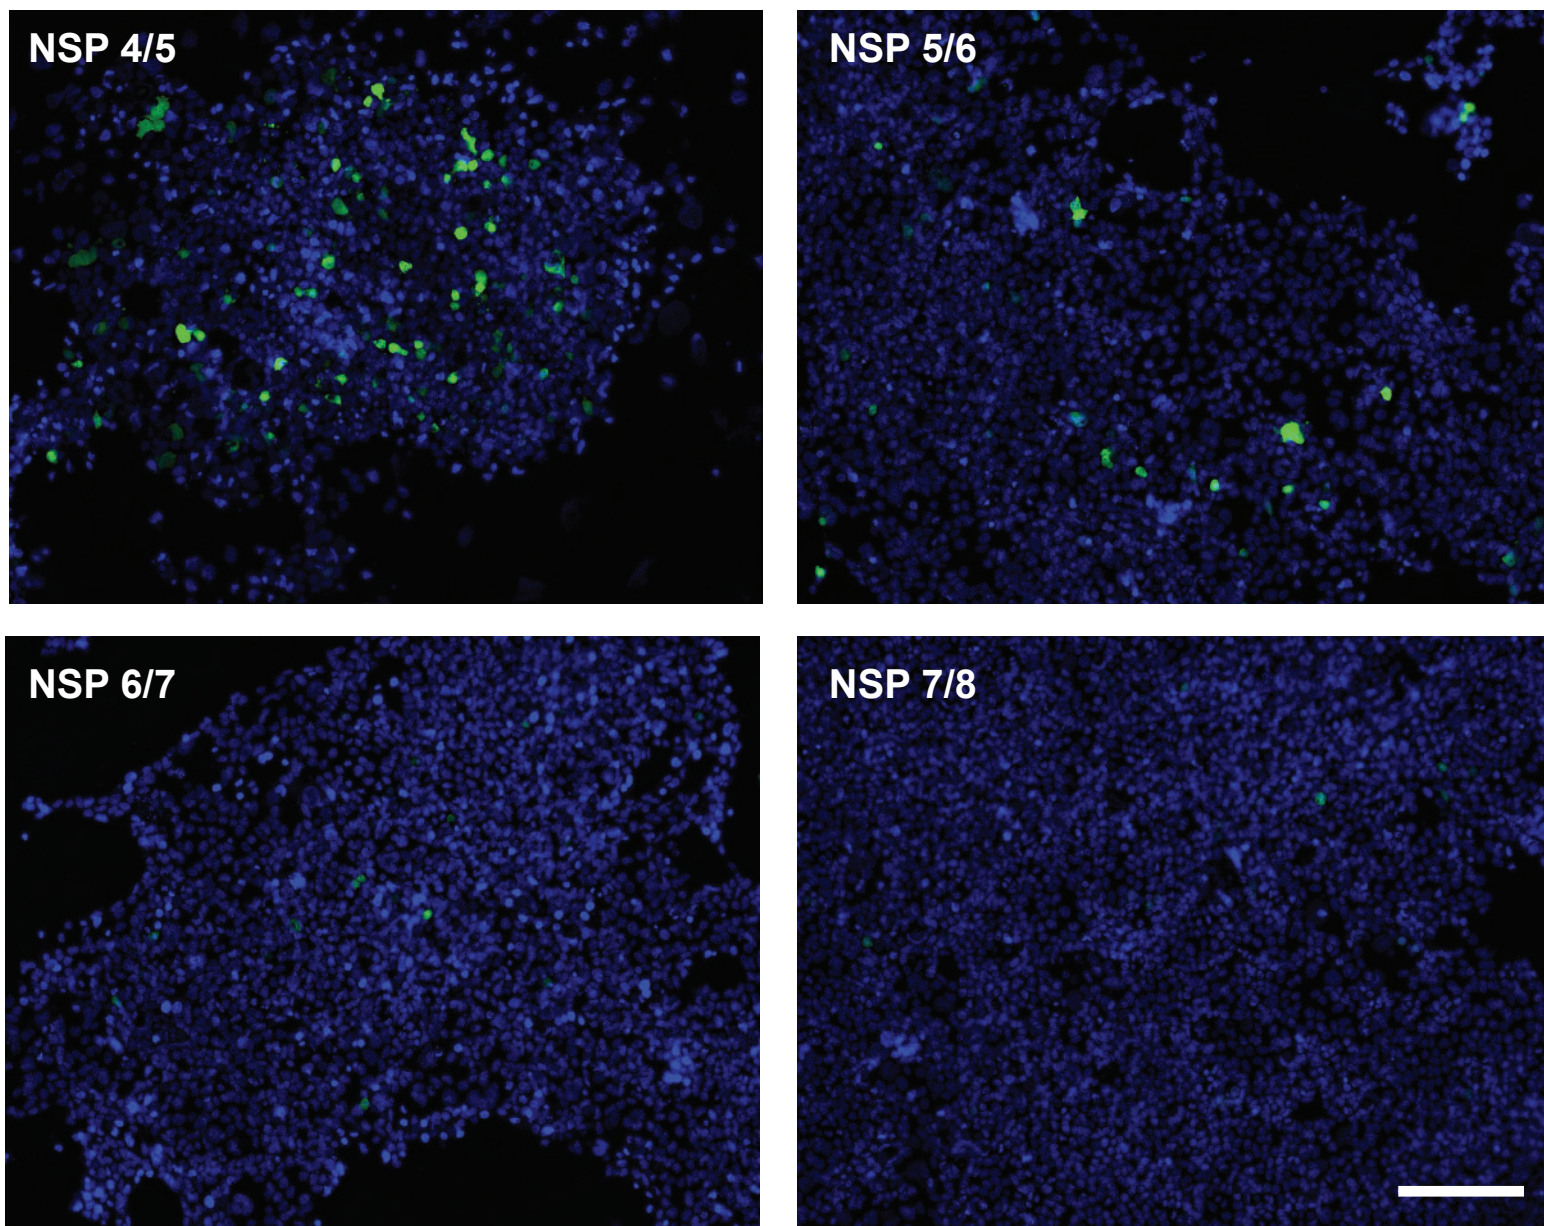

**Figure S1:** Representative fluorescence images of citrine expression in HEK293T cells 24h after transfection with different 3CL<sup>pro</sup> linkers corresponding to the viral NSP's junction sites. Scale bar, 100 $\mu$ m

Fig. S2.

Calpain inhibitors effect on 3CL<sup>pro</sup> activity

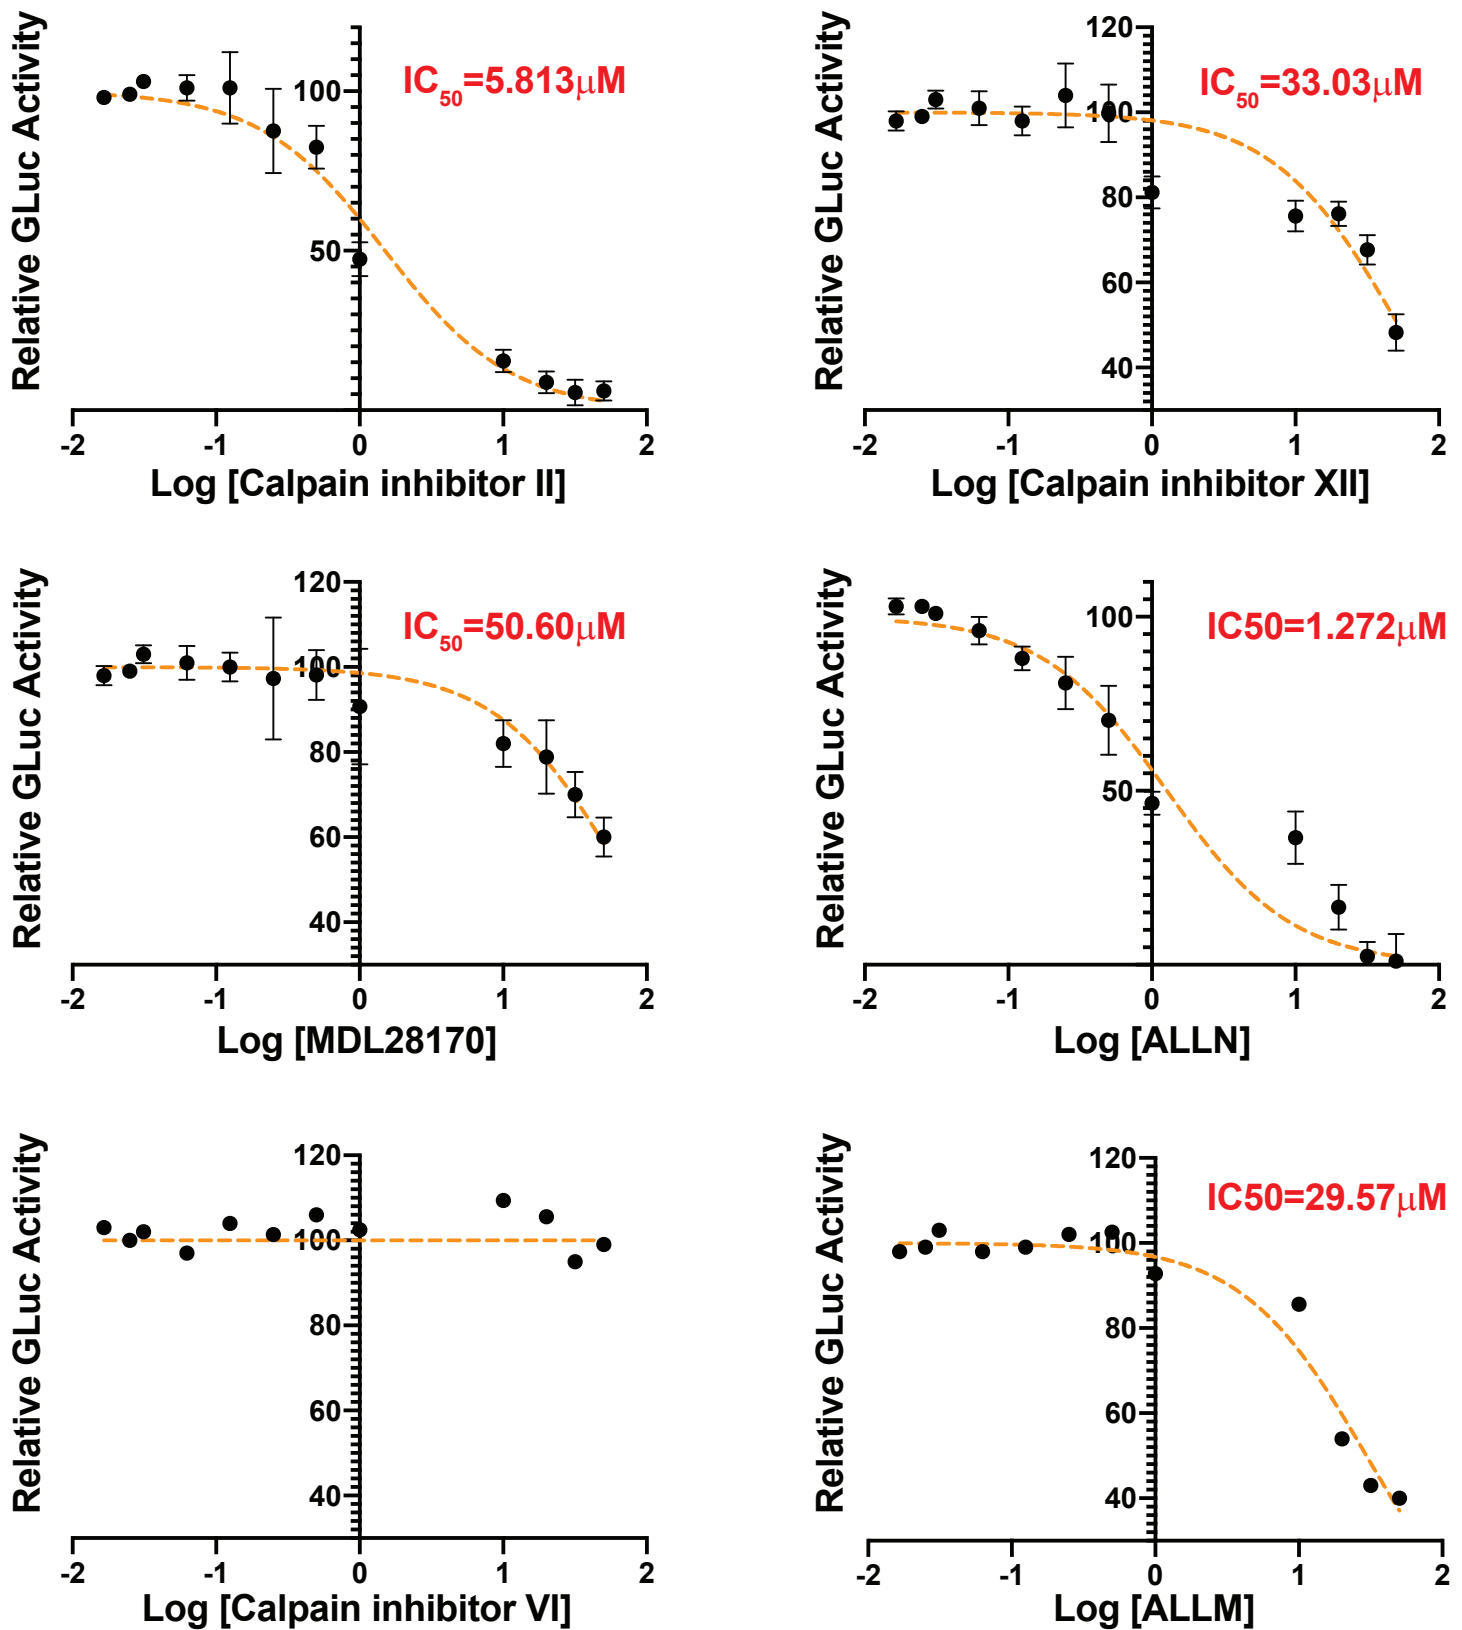

**Figure S2.** Each compound was tested in multiple concentrations, luminescent signal was recorded 48 h after compound addition and inhibition was calculated as the percentage of luminescent signal compared to the vehicle treated group. Data is plotted as mean ± SD, N=3 for each concentration point, nonlinear correlation analysis was used to evaluate compounds IC<sub>50</sub>.

**Fig. S3.**  
3CL<sup>pro</sup> *In-vitro* inhibition assay

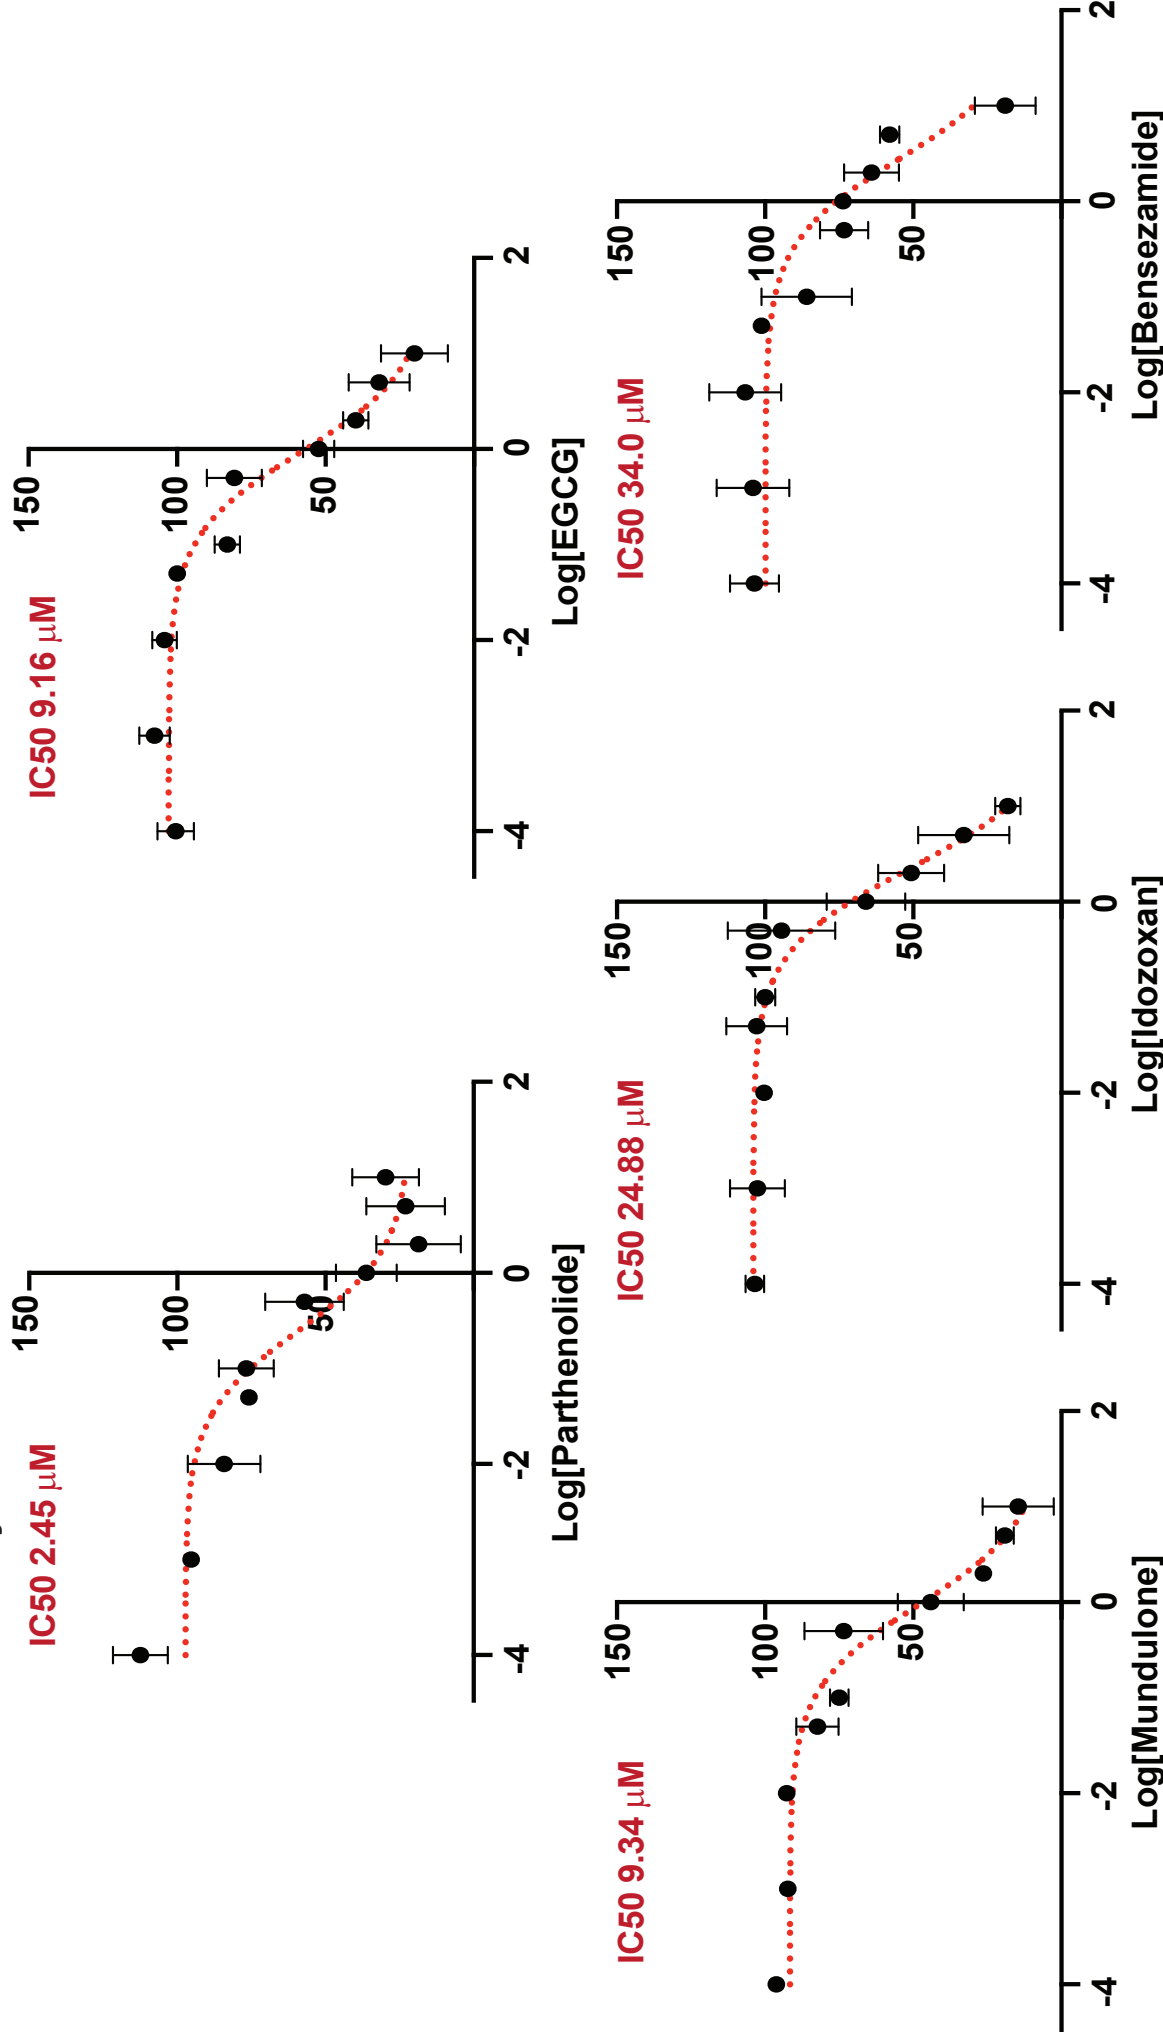

**Figure S3.** 3CL<sup>pro</sup> was incubated with each of the compounds in multiple concentrations (1hr, 25°C), followed by the addition of FRET peptide substrate. Protease activity was calculated as the relative fluorescent signal compared to the vehicle treated group (Ex 485, Em 525). Data is plotted as mean ± SD, N=3 for each concentration point, nonlinear correlation analysis was used to evaluate compounds IC<sub>50</sub>.



The modes of inhibitor binding in the catalytic site of 3CL<sup>pro</sup>

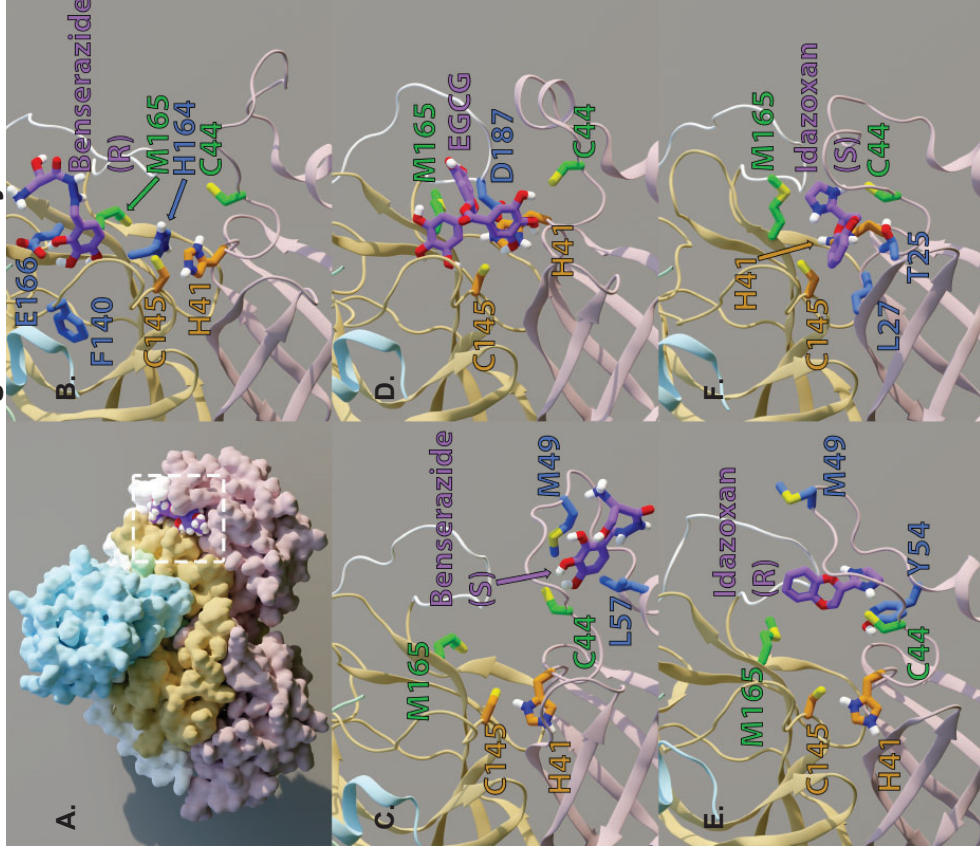

Fig. S4.

**Figure S4 .(A)** 3CL<sup>pro</sup> is shown in surface; D1 (pink); D2 (yellow); D3 (light blue); N-finger (mint); linker loop (white); Mundulone (R-enantiomer, purple). **(B-F)** Inhibitor binding modes: as in Figure 6; residues probed by mutagenesis (green); catalytic residues (orange); residues with large contribution to calculated enzyme-inhibitor binding free energy (BFE, blue). **(B)** Benserazide (R-enantiomer); **(C)** Benserazide (S-enantiomer); **(D)** EGCG; **(E)** Idazoxan (R-enantiomer); **(F)** Idazoxan (S-enantiomer).

**Fig. S5** Dimerization site docking poses

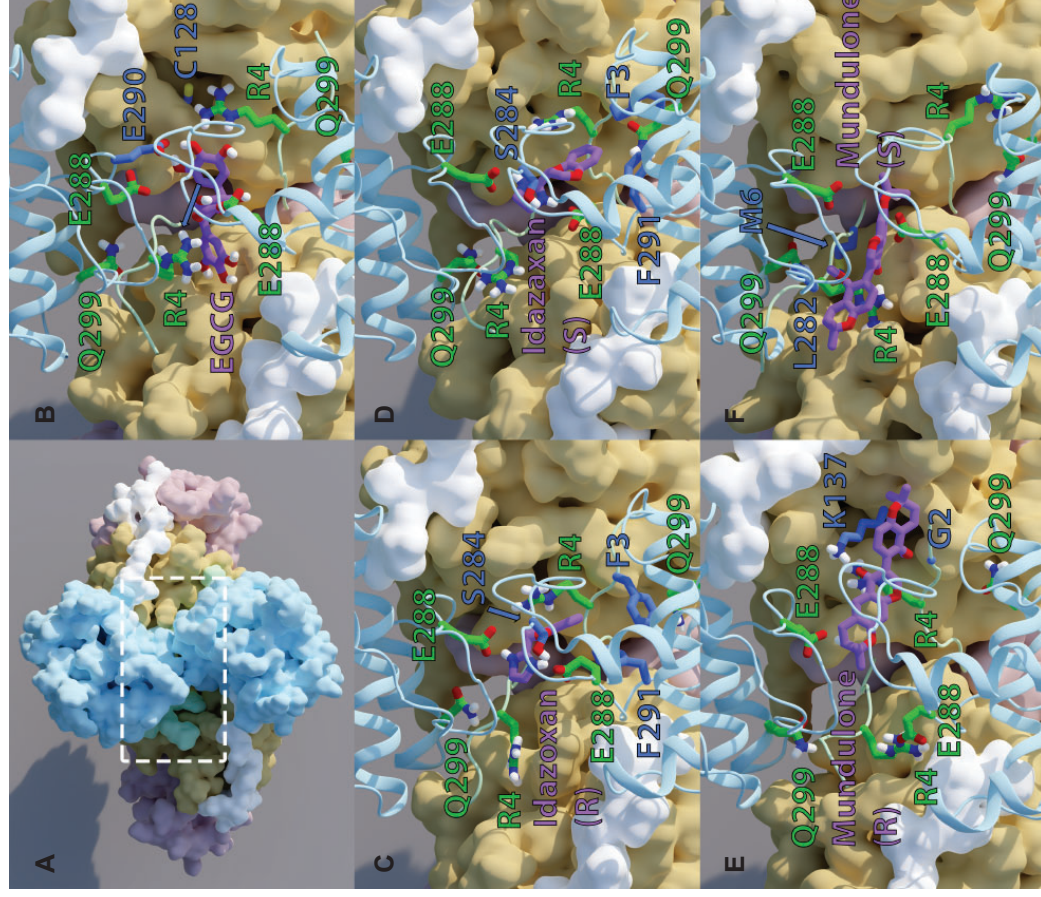

**Figure S5.**(A) 3CL<sup>pro</sup> is shown in surface; Domain 1 is pink; Domain 2 is yellow; Domain 3 is light blue; N-finger is mint; Linker loop is white. (B-F) Inhibitors binding modes: as in Figure 7, inhibitor is shown in purple; residues probed by mutagenesis are green; residues that are predicted to form important interactions with inhibitor are shown in blue. (B) EGCG; (C) Idazoxan (R-enantiomer); (D) Idazoxan (S-enantiomer); (E) Mundulone (R-enantiomer); (F) Mundulone (S-enantiomer)

**Fig. S6 Structural definition of decoy sites**

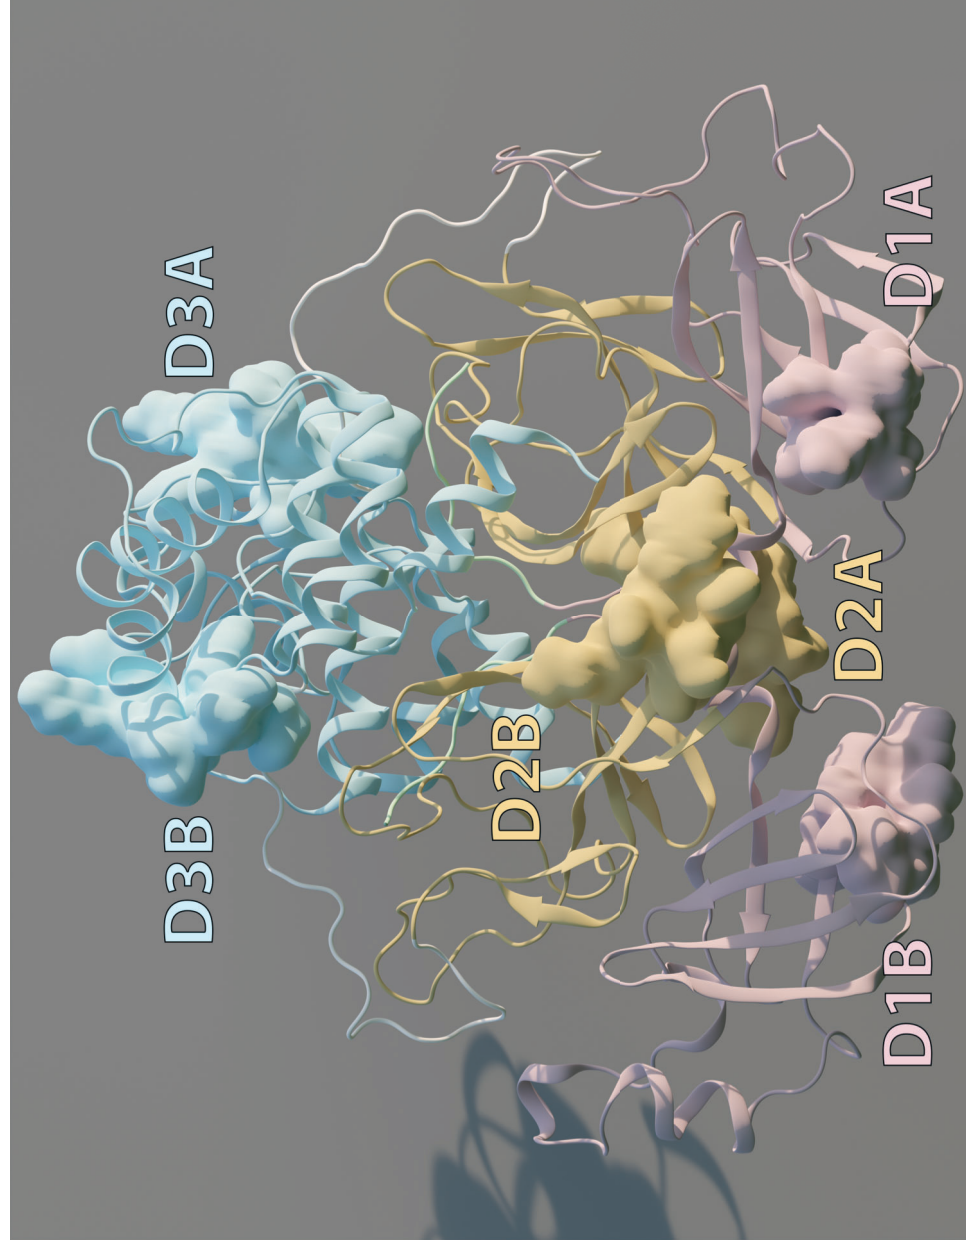

**Figure S6.** D1 is shown in pink (residues 69-75); D2 is shown in yellow (residues: 151-157); D3 is shown in light blue (residues: 235-241); decoy sites for protomers A and B are labeled accordingly.
